# Supplementary material for: Diamond lattice in single-component molecular crystals comprising tetrabenzoporphyrin neutral radicals
Source: Royal Society of Chemistry journal article supplement (doi:10.1039/d3cc05948k), 2024-01-01
Supplement: d3cc05948k1.pdf [file d3cc05948k1.pdf]

## **Diamond Lattice in Single-component Molecular Crystals Comprising Tetrabenzoporphyrin Neutral Radicals**

Kosuke Mine,<sup>a</sup> Sachie Arae,<sup>a</sup> Hiroshi Murakawa,<sup>b</sup> Masahisa Tsuchiizu,<sup>c</sup> Noriaki Hanasaki<sup>b</sup> and Masaki Matsuda<sup>\*a</sup>

<sup>a</sup> Department of Chemistry, Kumamoto University, 2-39-1 Kurokami, Chuo-ku, Kumamoto 860-8555, Japan. E-mail:

masaki@kumamoto-u.ac.jp

<sup>b</sup> Department of Physics, Osaka University, 1-1 Machikaneyama, Toyonaka, Osaka 560-0043, Japan.

<sup>c</sup> Department of Physics, Nara Women's University, Kitauoyanishi-machi, Nara 630-8506, Japan..

### **Contents**

|                                                                                                                                                                                       |          |
|---------------------------------------------------------------------------------------------------------------------------------------------------------------------------------------|----------|
| <b>Experimental details</b>                                                                                                                                                           | <b>2</b> |
| <b>Figure S1 Molecular structures of macrocyclic ligands of Pc<sup>2-</sup> and tbp<sup>2-</sup>.</b>                                                                                 | <b>4</b> |
| <b>Table S1 Crystal data and structure refinement results for Co(tbp)(CN)<sub>2</sub>, Fe(tbp)(CN)<sub>2</sub>, and Mn(tbp)Cl<sub>2</sub>.</b>                                        | <b>4</b> |
| <b>Figure S2 Molecular structures in crystals and optimized geometries by DFT theory of Co(tbp)(CN)<sub>2</sub>, Fe(tbp)(CN)<sub>2</sub> and Mn(tbp)(CN)<sub>2</sub> (side view).</b> | <b>5</b> |
| <b>Figure S3 Crystal structure of Co(tbp)(CN)<sub>2</sub>.</b>                                                                                                                        | <b>6</b> |
| <b>Figure S4 Intermolecular short contacts in Co(tbp)(CN)<sub>2</sub>.</b>                                                                                                            | <b>7</b> |

## Experimental details

### Synthetic procedures

$M^{II}(\text{tbp})$  was prepared as per the previously reported procedure.<sup>1</sup> An electrocrystallization cell equipped with a glass frit between two compartments was used for the electrolysis of  $\text{Co}(\text{tbp})$  solution (8.9 mg, 0.016 mmol) with (*n*- $\text{Bu}_4\text{N}$ ) $\cdot\text{CN}$  (11.5 mg, 0.043 mmol) in *N,N*-dimethylformamide (35 mL). A 0.2–1.0  $\mu\text{A}$  constant current was applied between two platinum electrodes immersed in the solution of each compartment for 3–4 weeks at 40 °C. Black prism-shaped crystals of  $\text{Co}^{\text{III}}(\text{tbp}^-)(\text{CN})_2$  (3.5 mg, 0.0056 mmol, 35%) deposited on the anode surface during the current flow, and were harvested via filtration. A similar procedure using  $\text{Fe}(\text{tbp})$  and  $\text{Ph}_4\text{P}\cdot\text{CN}$ , and  $\text{Mn}(\text{tbp})$  and  $\text{Ph}_4\text{P}\cdot\text{Cl}$  yielded black prism-shaped crystals of  $\text{Fe}^{\text{III}}(\text{tbp}^-)(\text{CN})_2$ , and  $\text{Mn}^{\text{III}}(\text{tbp}^-)\text{Cl}_2$ , respectively.

### Crystal structure determination

Crystal data for  $M^{\text{III}}(\text{tbp})(\text{CN})_2$  ( $M = \text{Co}, \text{Fe}$ ) and  $\text{Mn}^{\text{III}}(\text{tbp})\text{Cl}_2$  were collected at 293 K using an automated Rigaku SuperNova system with monochromated Mo- $K\alpha$  radiation ( $\lambda = 0.71073 \text{ \AA}$ ). The structure was solved using a direct method with SHELXT-2014/5<sup>2</sup> and refined using a full-matrix least-squares technique with SHELXL-2018/1.<sup>3</sup> Anisotropic and isotropic thermal parameters were employed for non-hydrogen and hydrogen atoms, respectively. Crystallographic data were deposited at the Cambridge Crystallographic Data Centre (CCDC).

### Measurements

The electrical resistivity of  $\text{Co}(\text{tbp})(\text{CN})_2$  was measured using a physical property measurement system from Quantum Design over 2–300 K temperature range with a four-probe technique under ambient and hydrostatic pressures. Gold wires were attached to the sample using gold paste. Hydrostatic pressure (0.35–2.4 GPa) was applied using a BeCu piston-cylinder cell with a pressure medium of DEMNUM S-20. The pressure was monitored using the manganin wire resistance.

Static magnetic susceptibility measurements of polycrystalline samples were performed using a magnetic property measurement system from Quantum Design, i.e., a superconducting quantum interference device (SQUID) under 0.01 or 1 T of static magnetic field over a 2–300 K temperature range. The core diamagnetism value was calculated as a sum of the Pascal's constants and used to correct the data.

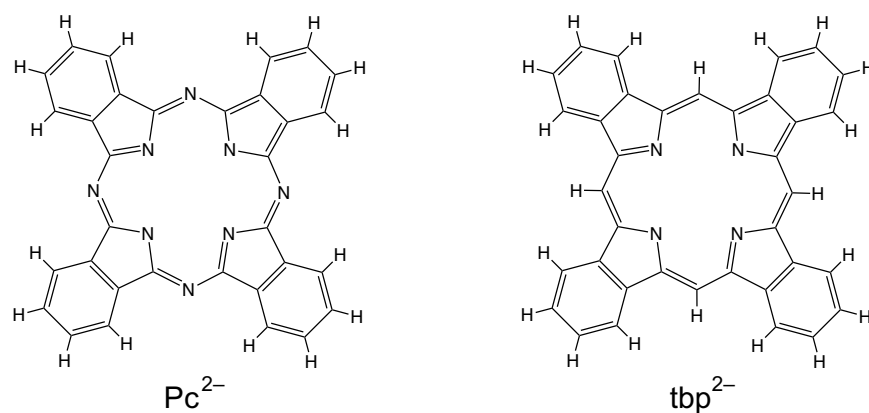

**Figure S1** Molecular structures of macrocyclic ligands of  $\text{Pc}^{2-}$  (left) and  $\text{tpb}^{2-}$  (right).

**Table S1.** Crystal data and structure refinement results for  $\text{Co}(\text{tpb})(\text{CN})_2$ ,  $\text{Fe}(\text{tpb})(\text{CN})_2$ , and  $\text{Mn}(\text{tpb})\text{Cl}_2$ .

|                                       |                                          |                                          |                                                     |
|---------------------------------------|------------------------------------------|------------------------------------------|-----------------------------------------------------|
| CCDC number                           | 2311221                                  | 2311222                                  | 2311223                                             |
| Chemical formula                      | $\text{C}_{38}\text{H}_{20}\text{CoN}_6$ | $\text{C}_{38}\text{H}_{20}\text{FeN}_6$ | $\text{C}_{36}\text{H}_{20}\text{Cl}_2\text{MnN}_4$ |
| Formula weight                        | 619.53                                   | 616.45                                   | 634.40                                              |
| Crystal description                   | Black prism                              | Black prism                              | Black prism                                         |
| Temperature / K                       | 293                                      | 293                                      | 293                                                 |
| Crystal system                        | Tetragonal                               | Tetragonal                               | Tetragonal                                          |
| Space group                           | $I4_1/a$                                 | $I4_1/a$                                 | $I4_1/a$                                            |
| $a / \text{\AA}$                      | 13.6416(3)                               | 13.7275(3)                               | 13.7890(4)                                          |
| $c / \text{\AA}$                      | 14.5402(6)                               | 14.5027(7)                               | 14.4334(8)                                          |
| $V / \text{\AA}^3$                    | 2705.83(16)                              | 2732.95(18)                              | 2744.3(2)                                           |
| $Z$                                   | 4                                        | 4                                        | 4                                                   |
| $d_{\text{cal}} / (\text{g cm}^{-3})$ | 1.521                                    | 1.498                                    | 1.535                                               |
| Radiation wavelength / $\text{\AA}$   | 0.71073 (MoK $\alpha$ )                  | 0.71073 (MoK $\alpha$ )                  | 0.71073 (MoK $\alpha$ )                             |
| $\mu / \text{mm}^{-1}$                | 0.677                                    | 0.594                                    | 0.711                                               |
| No. of measured reflections           | 4041                                     | 4095                                     | 6430                                                |
| No. of independent reflections        | 1574                                     | 1586                                     | 1589                                                |
| No. of observed reflections           | 1334 ( $I > 2\sigma(I)$ )                | 1220 ( $I > 2\sigma(I)$ )                | 1181 ( $I > 2\sigma(I)$ )                           |
| $R$ ( $I > 2\sigma(I)$ )              | $R_1 = 0.0357$<br>$wR_2 = 0.1010$        | $R_1 = 0.0404$<br>$wR_2 = 0.1161$        | $R_1 = 0.0379$<br>$wR_2 = 0.1199$                   |
| Goodness-of-fit                       | 1.107                                    | 1.073                                    | 1.077                                               |
| Parameters                            | 103                                      | 103                                      | 98                                                  |

The Gaussian 16 software package<sup>4</sup> was used to perform theoretical calculations using the density functional theory approach under the conditions of UB3LYP/6-311G(d) level. LANL2DZ basis set was applied for Mn, Fe, and Co atoms. Under the  $D_{2d}$  symmetry, structural optimization and frequency analysis were performed on initial structure. The atomic coordinates obtained by crystal structure analysis were used as an initial structure.

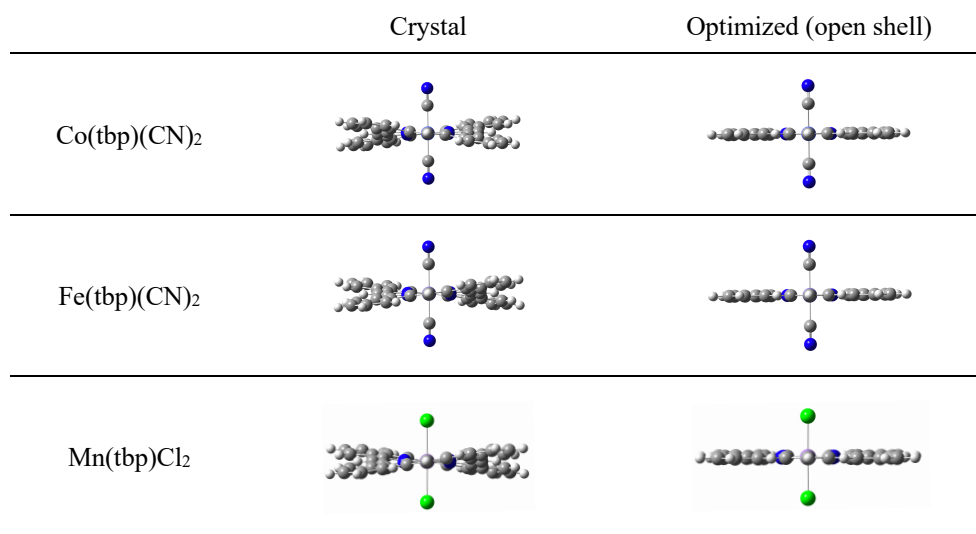

**Figure S2.** Molecular structures in crystals and optimized geometries by DFT theory of Co(tbp)(CN)<sub>2</sub>, Fe(tbp)(CN)<sub>2</sub> and Mn(tbp)Cl<sub>2</sub> (side view).

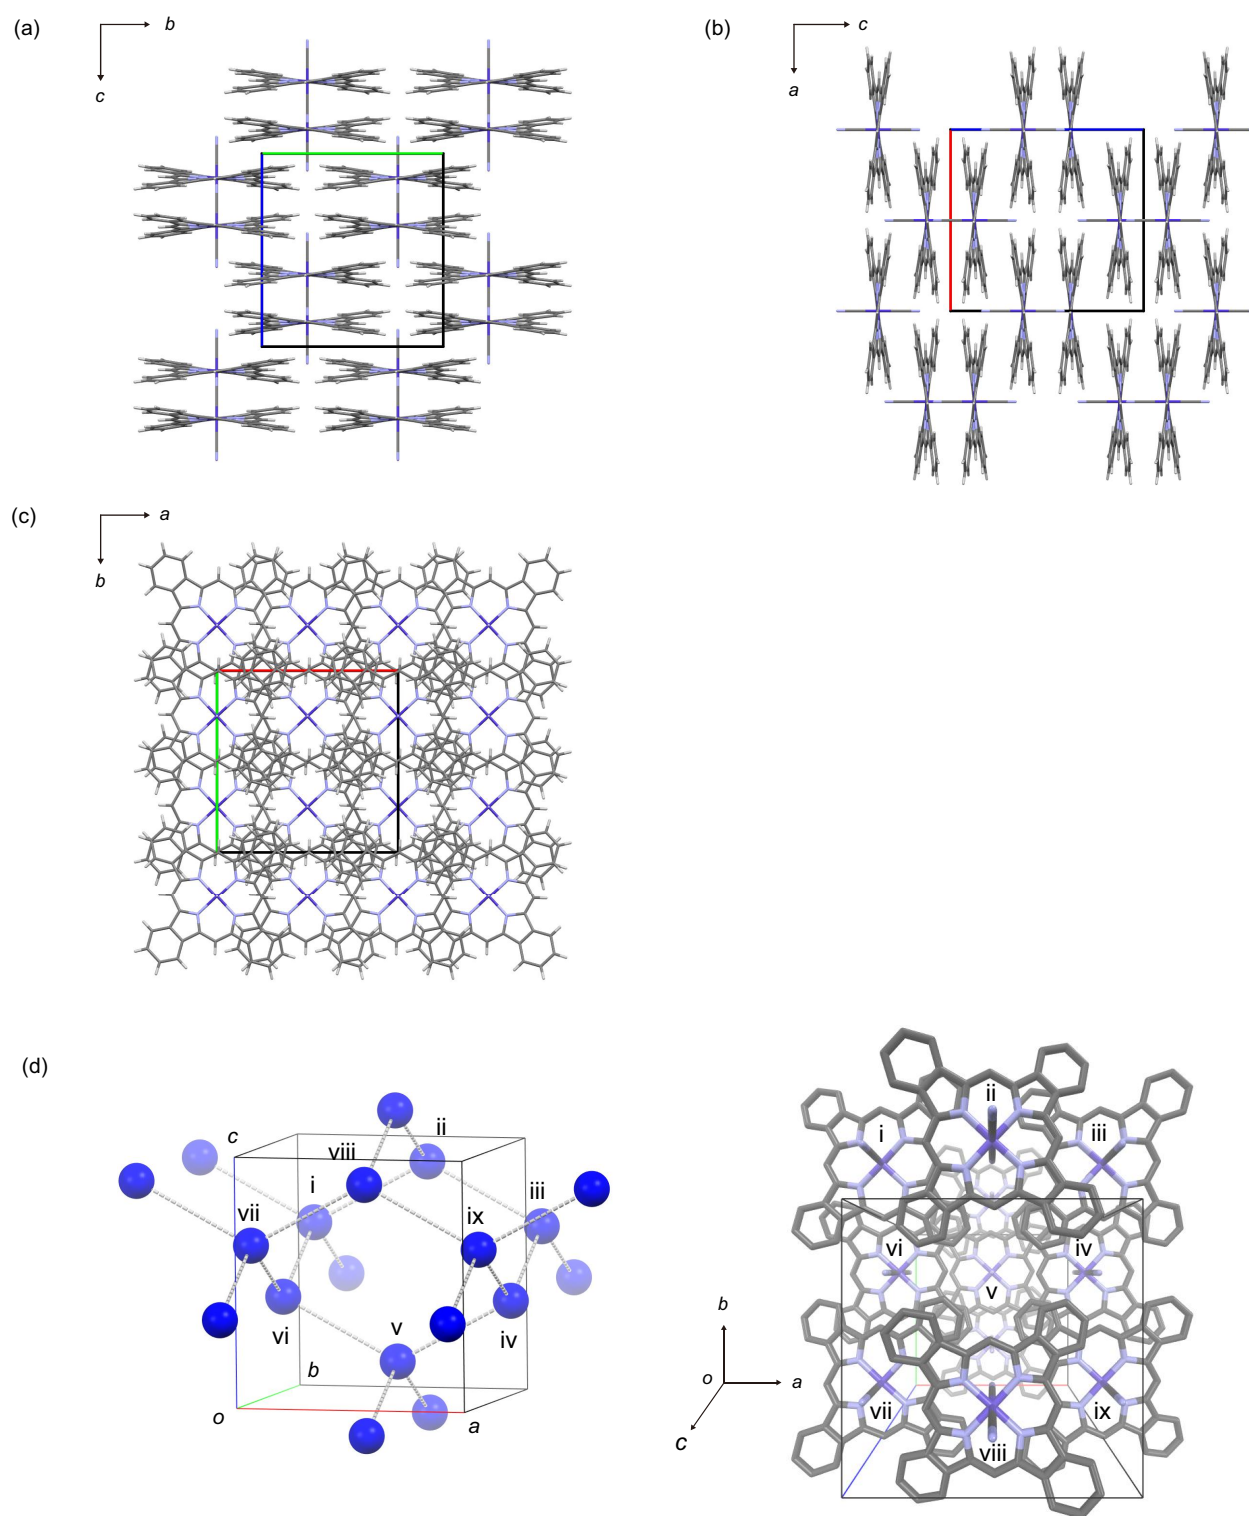

**Figure S3.** Crystal structure of  $\text{Co}(\text{tbp})(\text{CN})_2$  viewed along the  $a$ -axis (a),  $b$ -axis (b), and  $c$ -axis (c), and (d) the diamond arrangement of Co atoms (left) in the crystal structure (right).

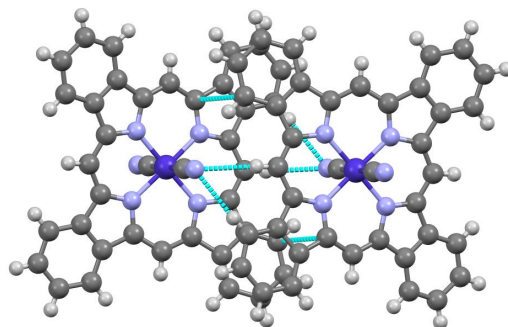

**Figure S4.** Intermolecular short contacts in  $\text{Co}(\text{tbp})(\text{CN})_2$ .

## References

- 1) a) S. Ito, T. Murashima, H. Uno, and N. Ono, *Chem. Commun.*, **1998**, 1661–1662; b) S. Ito, N. Ochi, T. Murashima, H. Uno, and N. Ono, *Heterocycles*, 2000, **52**, 399–411; c) S.-D. Jeong, B. Min, S. Y. Cho, C. Lee, B. K. Park, K.-S. An, and J. Lim, *J. Org. Chem.*, 2012, **77**, 8329–8331.
- 2) G. M. Sheldrick, *Acta Crystallogr., Sect. A: Found. Adv.*, **2015**, *71*, 3–8.
- 3) G. M. Sheldrick, *Acta Crystallogr., Sect. C: Struct. Chem.*, **2015**, *71*, 3–8.
- 4) M. J. Frisch, G. W. Trucks, H. B. Schlegel, G. E. Scuseria, M. A. Robb, J. R. Cheeseman, G. Scalmani, V. Barone, G. A. Petersson, H. Nakatsuji, X. Li, M. Caricato, A. V. Marenich, J. Bloino, B. G. Janesko, R. Gomperts, B. Mennucci, H. P. Hratchian, J. V. Ortiz, A. F. Izmaylov, J. L. Sonnenberg, D. Williams-Young, F. Ding, F. Lipparini, F. Egidi, J. Goings, B. Peng, A. Petrone, T. Henderson, D. Ranasinghe, V. G. Zakrzewski, J. Gao, N. Rega, G. Zheng, W. Liang, M. Hada, M. Ehara, K. Toyota, R. Fukuda, J. Hasegawa, M. Ishida, T. Nakajima, Y. Honda, O. Kitao, H. Nakai, T. Vreven, K. Throssell, J. A. Montgomery, Jr., J. E. Peralta, F. Ogliaro, M. J. Bearpark, J. J. Heyd, E. N. Brothers, K. N. Kudin, V. N. Staroverov, T. A. Keith, R. Kobayashi, J. Normand, K. Raghavachari, A. P. Rendell, J. C. Burant, S. S. Iyengar, J. Tomasi, M. Cossi, J. M. Millam, M. Klene, C. Adamo, R. Cammi, J. W. Ochterski, R. L. Martin, K. Morokuma, O. Farkas, J. B. Foresman, and D. J. Fox, Gaussian 16, Revision A.03, Gaussian, Inc., Wallingford CT, 2016.
